# Supplementary material for: Adaptive Evolution of Industrial Lactococcus lactis Under Cell Envelope Stress Provides Phenotypic Diversity
Source: Front Microbiol. 2018 Nov 5;9:2654. doi: 10.3389/fmicb.2018.02654 (PMC6230721; doi:10.3389/fmicb.2018.02654)
Supplement: Supplementary file 2 [file Data_Sheet_2.xlsx]

## Sheet: Hoja1
Table S1. Inhibition of growth in milk of Lactococcus lactis strains in the presence of phages1.
Phage	IPLA 517wt	IPLA 641wt	IPLA 729wt	IPLA1064wt	Phage family
CHPC52	-	-	-	-
CHPC116	-	-	-	-
CHPC122	-	-	-	-
CHPC129	-	-	-	-
CHPC134	pos	pos	pos	pos	c2
CHPC142	-	-	-	-
CHPC148	-	-	-	-
CHPC209	-	-	-	-
CHPC239	-	pos	-	-	unknonwn
CHPC324	-	-	-	-
CHPC361	-	pos	-	-	936
CHPC367	-	-	-	-
CHPC412	-	-	-	-
CHPC646	-	-	-	-
CHPC667	-	-	-	-
CHPC670	-	-	-	-
CHPC735	-	-	-	-
CHPC763	-	-	-	-
CHPC781	-	-	-	-
CHPC836	-	-	-	-
CHPC840	-	-	-	-
CHPC882	-	-	-	-
CHPC955	-	-	-	-
CHPC956	-	-	-	-
CHPC958	-	-	-	-
CHPC959	-	-	-	-
CHPC960	-	-	-	-
CHPC961	-	-	-	-
CHPC962	-	-	-	-
CHPC963	-	-	-	-
CHPC964	-	-	-	-
CHPC965	-	-	-	-
CHPC966	-	-	-	-
CHPC967	-	-	-	-
CHPC969	-	-	-	-
CHPC971	-	-	-	-
CHPC973	-	-	-	-
CHPC974	-	-	-	-
CHPC976	-	-	-	-
CHPC989	-	-	-	-
CHPC997	-	-	-	-
CHPC1020	-	-	-	-
CHPC1078	-	-	-	-
CHPC1112	-	-	-	-
CHPC1130	pos	pos	pos	pos	c2
CHPC1161	-	-	pos	-	c2
CHPC1166	-	-	-	-
CHPC1170	-	-	-	-
CHPC1182	-	-	pos	-	c2
CHPC1183	pos	pos	pos	pos	c2
CHPC1206	-	-	-	-
CHPC1218	-	-	-	-
CHPC1220	-	-	-	-
CHPC1235	-	-	-	-
CHPC1237	-	-	-	-
CHPC1242	-	-	-	-
CHPC1257	-	-	-	-
CHPC1266	-	-	-	-
CHPC1267	-	-	-	-
CHPC1285	pos	pos	pos	pos	c2
CHPC1287	-	-	-	-
CHPC1307	pos	pos	pos	pos	c2
1 Bacterial cultures were challenged with 62 phages at ca. 106 PFU/ml and the pH was monitored. When the pH of a control culture without added phage was at 5.0, the pH of the infected culture was recorded, and a phage was considered infective when the pH difference was more than 0.5 (pos).
