# Supplementary material for: Adaptive Evolution of Industrial Lactococcus lactis Under Cell Envelope Stress Provides Phenotypic Diversity
Source: Front Microbiol. 2018 Nov 5;9:2654. doi: 10.3389/fmicb.2018.02654 (PMC6230721; doi:10.3389/fmicb.2018.02654)
Supplement: Supplementary file 3 [file Data_Sheet_3.xlsx]

## Sheet: Hoja1
Table S2. Non-synonymous mutations found in Lcn972R mutants.
			Lactococcus lactis
			L81		L62		L98		IPLA517		IPLA641		IPLA1064		IPLA947
Gene	Annotation1	Sift2	D1	E2	C9	G9	C1	E2	B5	C6	C8	D8	C11	E11	R5
clpE	ATP-dependent protease	T	Gly246Ser
nagA	N-acetylglucosamine-6-phosphate deacetylase	T	Ala105Val
ysaB	ABC transporter permease	I	Pro605Thr/Phe577Ser	Phe577Val	Ile594Phe	Ile180Phe					Gly281Asp	Gly281Asp
WP_003129615.1	Branched-chain amino acid transport system	fs		Phe98fs
gltD	Glutamate synthase (NADPH/NADH) small chain	T		Ala21Thr
yfjC	Acylphosphatase	T		Thr91Pro
pbp1	Penicillin binding protein 1A/1B	I		Ala427Asp
ftsH	Cell division protease FtsH	I		Val263Ile/Asp343Tyr	Gly228Asp	Trp137*
preA	Prenyl transferase	I		Asp102Tyr	Ala61Glu
yeiF	Hypothetical protein	T			Val127Ile
argS	Arginyl-tRNA synthetase	fs			Glu453Ala Ile452fs His451fs
hsdR	Type I restriction endonuclease subunit R	T			Asp105Asn	Asp105Asn
ynhC	Hypothetical protein	I				Ser299Ile
yngF	Sugar ABC transporter permease	T				Ala87val
feoB	Ferrous ion transport protein B	stop				Arg419*
fbp	Fructose-1,6-bisphosphatase	T				Glu506Lys
relA	ppGpp synthetase I	T/stop					Arg228Leu	Arg228*
tagD1	Glycerol-3-phosphate cytidylyltransferase	stop					Glu46*	Glu46*
yudK	Hypothetical protein	T					Met203Ile	Met203Ile
purR	pur operon repressor	I					His30Tyr
yijE	Hypothetical protein	I						Gln156Lys
kinF	Sensor histidine kinase	T													Leu238Met
obg	GTPase ObgE	T													Ser209Asn
kinG	Sensor protein kinase	I							Ala108Asp	Ala108Asp	Ala107Val	Ala107Val	Val104Phe	Val104Phe
pyrH	Uridylate kinase	I							Asn170Lys	Asn170Lys	Thr81Ile	Thr81Ile	Gly25Glu	Gly25Glu
rgpD	Polysaccharide ABC transporter ATP-binding protein	Stop							Ser386*
cstA	Carbon starvation protein	T							Ala468Thr	Ala468Thr
rgpC	Polysaccharide ABC transporter permease	I								Arg167Ile
murF	D-Ala-D-Ala adding enzyme	I								Ser430Ile
dltD	D-alanine transfer protein	NA								Pro96Leu
ysaC	ABC transporter ATP-binding protein	I									Ser146Leu
polC	DNA polymerase III PolC	I									His1160Tyr
lysA	Diaminopimelate decarboxylase	T									Val252Ile
llrG	Two-component system regulator	T										Ala189Glu
dltB	Peptidoglycan biosynthesis protein	I											Pro154Ala	Pro154Ala
yphH	Hypothetical protein	NA											Ser126Pro
rpoC	DNA-directed RNA polymerase subunit beta	I											Glu822Lys
ycgF	Hypothetical protein	Stop											Gln135*	Gln135*
acmA	Autolysin	fs												Ser240Ala Thr241Asn Ser267fs
1, According to KEEG (https://www.genome.jp/)
2, Tolerant (T, white cells) or Intolerant (I, shaded cells) mutation according to SIFT: sorting Intolerant from tolerant (http://sift.bii.a-star.edu.sg/); NA, Not applicable.; *, a stop codon was introduced; fs, frameshifting,
